# Supplementary material for: An Elevated IL10 mRNA Combined with Lower TNFA mRNA Level in Active Rheumatoid Arthritis Peripheral Blood
Source: MDPI journal article supplement (doi:10.3390/cimb46030167), 2024-03-20
Supplement: s1 [file s1]

Supplementary Table S1. Serum levels of study cytokines in RA patients

| Cytokine levels     | Mean $\pm$ SD      | Q1<br>(p25) | Q2<br>(Median) | Q3<br>(p75) | Range          |
|---------------------|--------------------|-------------|----------------|-------------|----------------|
| IL-6 pg/ml          | 26.12 $\pm$ 52.5   | 1.81        | 6.57           | 20.96       | 0.00 - 258.99  |
| IL-10 pg/ml         | 8.23 $\pm$ 25.02   | 0.66        | 1.22           | 3.38        | 0.00 - 125.55  |
| IL-12p40 pg/ml      | 131.64 $\pm$ 99.92 | 70.06       | 106.76         | 160.00      | 7.88 - 473.65  |
| IL-17A pg/ml        | 35.54 $\pm$ 72.71  | 3.81        | 11.69          | 25.15       | 1.31 - 361.31  |
| IL-18 pg/ml         | 260.0 $\pm$ 201.64 | 108.86      | 205.64         | 342.07      | 35.64 - 977.00 |
| IL-23 pg/ml         | 30.74 $\pm$ 50.13  | 5.43        | 9.36           | 45.02       | 0.00 - 219.00  |
| TNF- $\alpha$ pg/ml | 4.76 $\pm$ 2.81    | 2.79        | 3.74           | 5.5         | 1.59 - 12.38   |
| TGF- $\beta$ ng/ml  | 15.13 $\pm$ 9.9    | 7.68        | 13.79          | 21.5        | 2.30 - 45.59   |
